# Supplementary material
Source: publisher site journal article supplement (https://www.spandidos-publications.com/4312/downloadSupplementary)
Supplement: Supplementary file 1 [file downloadSupplementary]

## Sheet: Sheet 1
Table SIV. GSEA hallmarks in PEA2 Ctrl cells vs. PEA1 Ctrl cells (adj P<0.05).
ID	Description	setSize	enrichmentScore	NES	pvalue	p.adjust	leading_edge	core_enrichment
TNFA_SIGNALING_VIA_NFKB	TNFA_SIGNALING_VIA_NFKB	191	0.613255	2.16734	1e-10	5e-09	tags=47%, list=12%, signal=41%	CCL2/TNF/IL23A/F3/IL1B/IL1A/LAMB3/PLAU/EDN1/CCL20/CSF2/F2RL1/PTGS2/IL6/BTG1/SERPINE1/CCN1/PMEPA1/TIPARP/GCH1/GADD45A/ICAM1/PLAUR/KLF4/TUBB2A/INHBA/SDC4/IER3/PTGER4/SMAD3/GADD45B/PPP1R15A/LDLR/LIF/SIK1/EFNA1/IER5/IL6ST/KLF9/TAP1/IER2/KYNU/PLK2/NR4A2/PHLDA2/MAFF/CCND1/NFKB2/KLF2/JAG1/ZC3H12A/B4GALT5/HBEGF/PLPP3/JUN/RNF19B/SGK1/DDX58/MXD1/ATF3/JUNB/IFIH1/PTPRE/B4GALT1/MAP2K3/NINJ1/NFKBIA/MAP3K8/FOS/…
E2F_TARGETS	E2F_TARGETS	193	-0.544023	-1.8723	1.58758e-08	3.96895e-07	tags=52%, list=20%, signal=42%	CENPE/PLK1/POLE4/BUB1B/POLD1/MYC/RRM2/DIAPH3/PDS5B/ZW10/GINS3/RPA3/DSCC1/MCM5/EZH2/AURKA/SMC6/NOLC1/EED/CBX5/H2AZ1/EXOSC8/BRCA1/SPAG5/RFC3/LMNB1/PLK4/GSPT1/PA2G4/HELLS/DUT/POLD3/TIPIN/CDKN3/PCNA/UNG/RACGAP1/NASP/BIRC5/RPA2/H2AX/STAG1/NCAPD2/UBR7/DLGAP5/TRIP13/NUP107/RAD51AP1/ESPL1/PAN2/PMS2/KPNA2/CDK4/SNRPB/XPO1/AURKB/RPA1/LUC7L3/KIF4A/CSE1L/NAA38/CENPM/RAD21/ILF3/SLBP/CKS2/MSH2/TACC3/RAN/CDC25B/…
OXIDATIVE_PHOSPHORYLATION	OXIDATIVE_PHOSPHORYLATION	190	-0.536724	-1.8446	4.76911e-08	7.94852e-07	tags=55%, list=20%, signal=45%	ACADVL/COX8A/CS/NDUFB8/ETFA/HSD17B10/ATP5F1B/IDH3G/COX11/SURF1/MRPL34/PMPCA/DLAT/MTRF1/DLD/MRPS30/MTRR/HSPA9/MDH1/IMMT/COX6C/COX6B1/NDUFB3/MGST3/NDUFV1/POR/MRPL15/ATP6V0C/MFN2/ATP6V0E1/NDUFB1/ETFB/BCKDHA/SLC25A11/ATP6V1F/COX6A1/SUCLG1/DECR1/HTRA2/OXA1L/SLC25A20/UQCRB/SDHD/ACAA1/NDUFS3/NDUFB2/PDHB/TIMM8B/ALAS1/ATP5PD/SLC25A12/MRPS15/ATP6V1C1/NDUFS2/NNT/ATP5MG/ATP5MC1/AFG3L2/UQCRC1/TIMM10/COX5A/ETF…
KRAS_SIGNALING_UP	KRAS_SIGNALING_UP	189	0.511489	1.80711	2.60738e-07	3.25923e-06	tags=26%, list=8%, signal=24%	CCND2/ALDH1A3/IL1B/SPON1/PLAU/CCL20/MPZL2/ADAM8/EMP1/MAP7/CSF2/F2RL1/IGFBP3/WNT7A/ST6GAL1/SERPINA3/GPRC5B/PTGS2/TFPI/JUP/PTPRR/PLAUR/IRF8/KLF4/INHBA/GNG11/HDAC9/TSPAN13/AKAP12/PLAT/PPP1R15A/SLPI/SEMA3B/LIF/ETV4/SOX9/MMP11/TMEM158/CFB/DCBLD2/SPRY2/HBEGF/PSMB8/GLRX/SNAP25/CBR4/TNFAIP3/PTCD2/CA2
ESTROGEN_RESPONSE_EARLY	ESTROGEN_RESPONSE_EARLY	188	0.486075	1.70796	4.83283e-06	4.83283e-05	tags=29%, list=8%, signal=27%	KRT19/CALB2/RAB17/OVOL2/CLDN7/TFAP2C/DHRS3/PODXL/RPS6KA2/SLC7A5/TUBB2B/AR/RHOD/TJP3/HSPB8/PTGES/STC2/TIPARP/FCMR/KLK10/FAM102A/SLC39A6/KLF4/TGIF2/SLC1A4/FLNB/OPN3/SEMA3B/SLC26A2/SLC27A2/KDM4B/LRIG1/XBP1/IL6ST/KRT18/KCNK5/GAB2/DYNLT3/SEC14L2/CCND1/THSD4/TPBG/SIAH2/SLC22A5/SLC2A1/RBBP8/GJA1/KRT8/B4GALT1/RHOBTB3/FOS/SFN/MUC1/MYOF/FOXC1
FATTY_ACID_METABOLISM	FATTY_ACID_METABOLISM	145	-0.518347	-1.7294	8.93486e-06	7.44572e-05	tags=37%, list=13%, signal=32%	SUCLG2/RDH11/CPOX/UROD/SUCLG1/DECR1/ENO2/SDHD/ACAA1/GPD2/PDHB/CCDC58/FASN/HADH/ACSL4/ETFDH/ENO3/ACAT2/ACOX1/IDH3B/LDHA/PTPRG/AUH/HSD17B11/SDHA/ECI1/METAP1/EPHX1/ACADM/DLST/ALDH3A1/ERP29/ECI2/HADHB/ACOT2/HMGCL/D2HGDH/ECH1/RAP1GDS1/IDH1/HPGD/CRAT/ALDH9A1/CRYZ/ALDH3A2/UGDH/EHHADH/ACAA2/ACSM3/PCBD1/GSTZ1/ACSL1/BMPR1B
APOPTOSIS	APOPTOSIS	154	0.493753	1.69905	1.08561e-05	7.75433e-05	tags=33%, list=13%, signal=29%	CCND2/BIK/TNF/IL1B/IL1A/EMP1/IL6/GSTM1/NEDD9/ISG20/GCH1/GADD45A/IER3/GADD45B/PLAT/MMP2/KRT18/ANXA1/TAP1/FEZ1/CCND1/TSPO/GSN/TXNIP/SPTAN1/JUN/CD14/H1-0/LGALS3/ATF3/PEA15/BID/CASP1/IFITM3/CTH/TIMP3/PPP2R5B/CDKN1B/PMAIP1/BCL2L1/LMNA/APP/PSEN2/CCNA1/AIFM3/BCL2L2/DNAJC3/ERBB3/IRF1/GPX4/DDIT3
G2M_CHECKPOINT	G2M_CHECKPOINT	195	-0.468856	-1.61775	5.05841e-05	0.00031615	tags=50%, list=21%, signal=40%	KIF5B/EWSR1/KIF22/KNL1/UBE2C/SMC2/NSD2/CENPE/PLK1/CDC27/MYC/POLQ/DBF4/SRSF10/MTF2/PDS5B/NOTCH2/SNRPD1/SFPQ/HSPA8/CUL1/MCM5/INCENP/EZH2/AURKA/NOLC1/H2AZ1/KIF15/WRN/LMNB1/KPNB1/SAP30/PLK4/GSPT1/NEK2/E2F2/CENPF/MARCKS/PRC1/CDKN3/RACGAP1/NASP/BIRC5/RPA2/H2AX/NUSAP1/STAG1/GINS2/CCNA2/RBM14/ESPL1/KIF23/STIL/TRAIP/KPNA2/CDK4/DTYMK/XPO1/AURKB/AMD1/EXO1/KIF4A/RPS6KA5/UCK2/RAD21/PBK/ILF3/CKS2/RAD54L/TACC3/…
P53_PATHWAY	P53_PATHWAY	189	0.453424	1.60196	8.98152e-05	0.000474555	tags=38%, list=14%, signal=33%	CCND2/IL1A/ST14/SERPINB5/BTG1/PERP/GADD45A/CDKN2B/VDR/KLF4/IER3/UPP1/EPHA2/PPP1R15A/TGFA/LIF/CDH13/PLXNB2/IER5/TAP1/PLK2/ITGB4/TRIB3/RHBDF2/BAIAP2/NUPR1/TXNIP/RALGDS/HBEGF/H2AW/JUN/RNF19B/MXD1/ATF3/SLC3A2/ZNF365/PTPRE/RPL36/ANKRA2/CCP110/MKNK2/NINJ1/ZMAT3/ABCC5/TRAF4/FOS/CASP1/TNFSF9/CSRNP2/SFN/WRAP73/TRAFD1/ELP1/OSGIN1/SEC61A1/CDK5R1/SPHK1/TSPYL2/ABHD4/HRAS/APP/IRAK1/RCHY1/DDIT3/CDKN2A/PROCR/CTS…
INFLAMMATORY_RESPONSE	INFLAMMATORY_RESPONSE	189	0.452112	1.59733	9.4911e-05	0.000474555	tags=23%, list=10%, signal=21%	CCL2/PDPN/F3/IL1B/IL1A/CXCL8/EDN1/CCL20/NPFFR2/LAMP3/IL6/IRF7/SERPINE1/GCH1/ICAM1/PLAUR/INHBA/PTGER4/LDLR/LIF/SLC31A2/CD55/IL4R/TAPBP/TPBG/ATP2C1/DCBLD2/HPN/MMP14/HBEGF/CD14/MXD1/SLC7A1/ITGB8/PTPRE/IFITM1/NFKBIA/TNFSF9/ADRM1/IL18R1/SPHK1/ATP2A2/IL1R1/ICOSLG
INTERFERON_GAMMA_RESPONSE	INTERFERON_GAMMA_RESPONSE	188	0.446857	1.57015	0.000117969	0.000536224	tags=38%, list=16%, signal=32%	CCL2/IFI27/MX2/ARID5B/PTGS2/IL6/BTG1/IRF7/CD74/ISG20/PSMB9/PELI1/GCH1/HLA-B/ICAM1/IRF8/HELZ2/UPP1/HLA-A/PIM1/MT2A/DHX58/TAP1/HLA-G/IDO1/PLSCR1/CFB/IL4R/TAPBP/ISG15/TRIM21/TXNIP/OGFR/ZNFX1/DDX58/PARP12/PSMB8/IFIH1/SP110/RBCK1/NFKBIA/CASP1/TNFAIP3/IFITM3/MTHFD2/WARS1/TRAFD1/STAT3/MVP/TOR1B/PLA2G4A/PSMA2/XAF1/PSME2/IRF1/RIPK1/PML/B2M/SECTM1/CD86/AUTS2/NFKB1/UBE2L6/IFITM2/GBP4/RSAD2/ADAR/PDE4B/JAK2/P…
ADIPOGENESIS	ADIPOGENESIS	188	-0.449835	-1.547	0.000192813	0.000803386	tags=44%, list=21%, signal=35%	PTCD3/PREB/ARAF/COX8A/CS/COQ9/IDH3G/ADIPOR2/MAP4K3/STAT5A/DLAT/G3BP2/SLC66A3/TANK/DLD/ESYT1/CPT2/SCARB1/RNF11/IMMT/ADCY6/MGST3/POR/COL4A1/MRPL15/MTARC2/FZD4/VEGFB/ETFB/BCKDHA/DRAM2/ATL2/ALDH2/ATP1B3/APLP2/COX6A1/ACLY/SUCLG1/DECR1/COQ5/GPD2/NDUFS3/ANGPTL4/TOB1/TKT/HADH/UQCRC1/NKIRAS1/PPM1B/ACOX1/LPCAT3/SLC5A6/AIFM1/PRDX3/AK2/EPHX2/CYC1/GPHN/ACADM/PLIN2/CHCHD10/GPX3/STOM/QDPR/ECH1/CDKN2C/FAH/IDH1/C…
INTERFERON_ALPHA_RESPONSE	INTERFERON_ALPHA_RESPONSE	91	0.515292	1.654	0.000311067	0.00119641	tags=42%, list=15%, signal=36%	IFI27/LAMP3/IRF7/CD74/ISG20/PSMB9/HELZ2/DHX58/TAP1/PLSCR1/IL4R/ISG15/TRIM21/TXNIP/OGFR/HLA-C/PARP12/PSMB8/IFIH1/IFITM1/GBP2/SP110/CASP1/IFITM3/WARS1/TRAFD1/GMPR/TRIM5/NUB1/CD47/PSME2/IRF1/PROCR/B2M/UBE2L6/IFITM2/GBP4/RSAD2
COMPLEMENT	COMPLEMENT	191	0.434343	1.53504	0.000439853	0.0015709	tags=31%, list=16%, signal=27%	F3/SPOCK2/TFPI2/PDGFB/SERPINA1/PRSS3/PLA2G7/IL6/IRF7/SERPINE1/PSMB9/DOCK9/CALM1/PLAUR/PLAT/CSRP1/APOBEC3G/HSPA1A/MMP15/CDH13/PIM1/CD55/KYNU/PDP1/PLSCR1/CFB/MAFF/CD59/MMP14/LGALS3/FN1/CD46/CASP1/TNFAIP3/CA2/HSPA5/SRC/PLA2G4A/ERAP2/LIPA/CDK5R1/STX4/LAMP2/ME1/DUSP6/RCE1/GATA3/GNAI3/IRF1/PPP4C/RHOG/KIF2A/CR1/CBLB/CTSH/PIK3CA/DGKG/FYN/GNAI2/JAK2
APICAL_JUNCTION	APICAL_JUNCTION	188	0.412613	1.44983	0.00109549	0.00365165	tags=29%, list=14%, signal=25%	CALB2/CLDN7/LAMB3/CDH3/CRB3/MPZL2/CD34/MDK/CDH1/JUP/LAMC2/MYH9/ICAM1/CDH4/LAMA3/MMP2/MYL9/RASA1/COL16A1/ADAMTS5/GRB7/SHROOM2/ITGB4/RAC2/CLDN11/BAIAP2/LIMA1/PCDH1/CNN2/ADRA1B/PARVA/CD99/B4GALT1/BMP1/ADAM15/AMH/VWF/CD276/SRC/MVD/DLG1/YWHAH/HRAS/STX4/NEGR1/FSCN1/TAOK2/MMP9/ITGB1/CLDN4/TGFBI/MAPK11/CD86/PKD1
UNFOLDED_PROTEIN_RESPONSE	UNFOLDED_PROTEIN_RESPONSE	107	0.4731	1.55984	0.00154798	0.00483743	tags=38%, list=13%, signal=33%	CCL2/SLC7A5/STC2/ASNS/TUBB2A/SLC1A4/DNAJB9/HERPUD1/XBP1/SERP1/EIF2AK3/EIF4A2/ARFGAP1/TTC37/HYOU1/ATF3/FKBP14/CEBPG/MTREX/EIF4EBP1/EEF2/DNAJA4/EIF4G1/CHAC1/BAG3/MTHFD2/EXOSC5/SRPRB/PSAT1/PARN/HSPA5/TARS1/TSPYL2/CALR/VEGFA/DNAJC3/NFYA/SEC31A/SLC30A5/ATF4/EIF4E
ALLOGRAFT_REJECTION	ALLOGRAFT_REJECTION	184	0.407972	1.43158	0.00211813	0.00622978	tags=23%, list=17%, signal=20%	CCND2/CCL2/TNF/IL1B/IL6/IRF7/CD74/ICAM1/IRF8/INHBA/HDAC9/HLA-A/LIF/TAP1/HLA-G/IL4R/TAPBP/MAP3K7/GBP2/TAP2/WARS1/HCLS1/ELF4/AARS1/GALNT1/ICOSLG/CD47/ITGB2/MMP9/CDKN2A/B2M/CD86/TPD52/DEGS1/TRAF2/SRGN/JAK2/CD8B/CD40/BCL3/FLNA/LTB/HLA-DRA
ESTROGEN_RESPONSE_LATE	ESTROGEN_RESPONSE_LATE	190	0.402848	1.42288	0.00397559	0.0110433	tags=26%, list=8%, signal=24%	KRT19/OVOL2/TFAP2C/TFPI2/ST14/RPS6KA2/SERPINA5/MDK/CDH1/SERPINA1/SLC7A5/SERPINA3/LARGE1/TJP3/ISG20/HSPB8/PTGES/PERP/LAMC2/KLK10/FAM102A/KLF4/TSPAN13/SLC1A4/FLNB/OPN3/PKP3/SEMA3B/SLC26A2/SLC27A2/NMU/CYP4F11/XBP1/IL6ST/ASS1/LSR/KCNK5/DYNLT3/CCND1/TPBG/SIAH2/CD9/SLC22A5/SGK1/RBBP8/FOS/SFN/CA2/MYOF/FOXC1
EPITHELIAL_MESENCHYMAL_TRANSITION	EPITHELIAL_MESENCHYMAL_TRANSITION	191	0.392553	1.38734	0.00556379	0.0146416	tags=30%, list=10%, signal=27%	DPYSL3/COL5A1/DKK1/CXCL8/COL12A1/TFPI2/IGFBP3/PRSS2/IL6/NID2/SERPINE1/LAMC2/CCN1/PMEPA1/GADD45A/PLAUR/INHBA/SDC4/PDLIM4/GADD45B/BDNF/SNAI2/LAMA3/MMP2/MYL9/EDIL3/IL32/CDH2/SERPINE2/LOXL1/COL16A1/MAGEE1/FSTL1/CADM1/CALU/CD59/HTRA1/DST/PLOD2/MMP14/NT5E/JUN/ADAM12/GJA1/SERPINH1/FN1/BMP1/TNFAIP3/COLGALT1/TIMP3/LGALS1/CALD1/THBS1/GREM1/ITGB5/MATN2/COPA
HYPOXIA	HYPOXIA	196	0.387668	1.37331	0.00612968	0.0146965	tags=32%, list=14%, signal=28%	HS3ST1/COL5A1/F3/EDN2/PDGFB/IGFBP3/CAVIN3/IL6/BTG1/LARGE1/ISG20/DTNA/SERPINE1/STC2/CCN1/GPC4/TIPARP/MYH9/IDS/PLAUR/SDC4/IER3/AKAP12/PPP1R15A/CAVIN1/PIM1/MT2A/EFNA1/KLHL24/P4HA2/MAFF/TPBG/MT1E/SIAH2/JUN/SLC2A1/TMEM45A/ATF3/HOXB9/GLRX/FOS/ERRFI1/TNFAIP3/DUSP1/CCNG2/HSPA5/CDKN1B/NDST1/PRDX5/PNRC1/PAM/VEGFA/CXCR4/ZFP36/NR3C1/MAP3K1/TGFBI/DDIT3/GAA/ATP7A/NEDD4L/TPD52
COAGULATION	COAGULATION	127	0.418363	1.40407	0.00617254	0.0146965	tags=24%, list=9%, signal=22%	F3/PLAU/TFPI2/PDGFB/SERPINA1/THBD/SERPINE1/PLAT/CSRP1/MMP2/MMP15/MMP11/ANXA1/CFB/MAFF/CD9/GSN/HTRA1/CAPN2/HPN/MMP14/DUSP14/RAC1/FN1/BMP1/FURIN/TIMP3/ARF4/THBS1/VWF
MYC_TARGETS_V1	MYC_TARGETS_V1	192	-0.39162	-1.34895	0.0092553	0.0210348	tags=43%, list=21%, signal=34%	SSBP1/CDK2/MAD2L1/CCT3/YWHAQ/PGK1/RNPS1/NAP1L1/RFC4/PSMC4/CCT2/POLD2/PHB/COPS5/EXOSC7/YWHAE/MYC/SNRPA/NPM1/PCBP1/SNRPD1/ABCE1/DHX15/RPL6/RSL1D1/CUL1/PTGES3/MCM5/CLNS1A/ACP1/NOLC1/DDX18/H2AZ1/RPS2/PSMA4/KPNB1/ERH/GSPT1/TCP1/PA2G4/DUT/SNRPD2/PABPC1/PCNA/CCNA2/RPL14/KPNA2/CDK4/PPIA/NOP16/UBA2/XPO1/RAN/COX5A/UBE2E1/HNRNPA1/CAD/SLC25A3/SNRPG/HSPD1/PABPC4/LDHA/RPLP0/MCM7/MCM4/PRDX3/HPRT1/C1QBP/CYC1/CTP…
PEROXISOME	PEROXISOME	99	-0.457578	-1.45235	0.0102741	0.022335	tags=44%, list=17%, signal=37%	ABCB4/DHCR24/PEX5/CRABP2/SLC25A19/PEX13/SOD2/PABPC1/CTBP1/RDH11/PEX11A/CLN8/ALB/CLN6/FDPS/GNPAT/ACAA1/PRDX1/SEMA3C/ERCC1/MSH2/ACSL4/PEX2/ABCB9/GSTK1/ACOX1/HSD17B11/FADS1/EPHX2/CTPS1/IDH2/ITGB1BP1/ECI2/HMGCL/ECH1/IDH1/CAT/CRAT/DLG4/ALDH9A1/EHHADH/ABCB1/UGT2B17/ACSL1
DNA_REPAIR	DNA_REPAIR	137	-0.404903	-1.34131	0.0178039	0.0370915	tags=44%, list=22%, signal=34%	TK2/POLR1C/RFC4/DGUOK/GTF2H1/POLR3C/CETN2/REV3L/POLE4/DCTN4/TAF12/POLD1/POLD4/MRPL40/SURF1/AAAS/RPA3/RRM2B/NPR2/GTF2A2/TAF6/ADCY6/STX3/RFC3/PRIM1/SF3A3/ZWINT/DUT/POLR3GL/POLD3/ARL6IP1/POLR2G/PCNA/RPA2/ELOA/EIF1B/RFC5/POLR2D/VPS28/XPC/CSTF3/ERCC1/LIG1/ALYREF/GTF2H5/MPG/HPRT1/PNP/NT5C/ADA/RFC2/POLR2I/NME1/POLA2/NUDT9/TYMS/TARBP2/IMPDH2/MPC2/NME4
XENOBIOTIC_METABOLISM	XENOBIOTIC_METABOLISM	186	-0.375875	-1.29074	0.0196228	0.0392456	tags=31%, list=17%, signal=26%	SLC6A6/ASL/PTGES3/GSS/AKR1C2/ACP1/ACOX2/SMOX/POR/PMM1/HACL1/ABHD6/PGRMC1/ADH5/ALDH2/ACOX3/AP4B1/TPST1/HMOX1/ALAS1/GART/GCNT2/SAR1B/GSR/ETFDH/ACP2/ACOX1/NFS1/TNFRSF1A/TMEM97/TKFC/HPRT1/NDRG2/MTHFD1/EPHX1/ALDH3A1/LPIN2/MPP2/CYB5A/BLVRB/ECH1/FAH/CNDP2/IDH1/CAT/NQO1/ALDH9A1/UGDH/CYFIP2/CYP2J2/APOE/RAP1GAP/PTGDS/ID2/PROS1/DDC/AKR1C3/FBLN1
